# Supplementary material for: Gene Expression of the Endocannabinoid System in Endometrium Through Menstrual Cycle
Source: Research Square preprint supplement (doi:10.21203/rs.3.rs-1084037/v1), 2021-11-30
Supplement: Supplementary file 1 [file 076768dea557948a15965434.xlsx]

## Sheet: TableS9
S9: Differential gene expression analysis between the menstrual and early proliferative stage
ENSEMBL	gene_name	logFC	P.Value	adj.P.Val	Pass adj p and correction for 6 Menstrual Cycle Tests
ENSG00000075651	PLD1	1.82921	3.18882e-05	0.000685268	Yes
ENSG00000012779	ALOX5	1.83574	3.42634e-05	0.000685268	Yes
ENSG00000123739	PLA2G12A	-0.513936	0.000140555	0.00187407	Yes
ENSG00000134242	PTPN22	1.3539	0.000349401	0.00349401	Yes
ENSG00000134780	DAGLA	-1.10033	0.000500938	0.0040075	Yes
ENSG00000138193	PLCE1	-0.97929	0.000651138	0.00434092	Yes
ENSG00000138744	NAAA	-0.957501	0.00173364	0.00882992	Yes
ENSG00000073756	PTGS2	2.89342	0.00176598	0.00882992	Yes
ENSG00000161048	NAPEPLD	-0.50518	0.00400939	0.0178195	No
ENSG00000197943	PLCG2	0.545782	0.0372794	0.149118	No
ENSG00000161714	PLCD3	0.536435	0.0530587	0.192941	No
ENSG00000149527	PLCH2	0.91642	0.101786	0.339286	No
ENSG00000153982	GDPD1	0.469056	0.121005	0.372323	No
ENSG00000117480	FAAH	-0.327054	0.135952	0.388435	No
ENSG00000182621	PLCB1	-0.448659	0.166958	0.44522	No
ENSG00000124181	PLCG1	0.212031	0.184714	0.454767	No
ENSG00000171428	NAT1	-0.398677	0.193276	0.454767	No
ENSG00000146070	PLA2G7	0.48429	0.226533	0.489678	No
ENSG00000100439	ABHD4	0.268914	0.232597	0.489678	No
ENSG00000114805	PLCH1	-0.411945	0.249232	0.498463	No
ENSG00000187091	PLCD1	-0.256262	0.332726	0.613662	No
ENSG00000121769	FABP3	0.735295	0.339157	0.613662	No
ENSG00000164687	FABP5	0.452225	0.352856	0.613662	No
ENSG00000163686	ABHD6	-0.19441	0.37771	0.629517	No
ENSG00000129219	PLD2	-0.113605	0.453865	0.715978	No
ENSG00000115896	PLCL1	0.386379	0.466948	0.715978	No
ENSG00000149782	PLCB3	-0.138857	0.494667	0.715978	No
ENSG00000105499	PLA2G4C	0.173635	0.534275	0.715978	No
ENSG00000137841	PLCB2	0.180153	0.537407	0.715978	No
ENSG00000116711	PLA2G4A	0.254169	0.549455	0.715978	No
ENSG00000074416	MGLL	-0.183592	0.554883	0.715978	No
ENSG00000006007	GDE1	0.076572	0.58569	0.718994	No
ENSG00000100197	CYP2D6	-0.243971	0.59317	0.718994	No
ENSG00000101333	PLCB4	-0.142117	0.642297	0.755643	No
ENSG00000102886	GDPD3	0.172057	0.690185	0.788783	No
ENSG00000243708	PLA2G4B	0.216265	0.751586	0.816086	No
ENSG00000196689	TRPV1	0.0916926	0.754879	0.816086	No
ENSG00000154822	PLCL2	0.0340222	0.867906	0.913586	No
ENSG00000100997	ABHD12	-0.0130193	0.947679	0.966052	No
ENSG00000184381	PLA2G6	0.0140543	0.966052	0.966052	No

## Sheet: TableS10
S10: Differential gene expression analysis between the early proliferative and mid proliferative stage
ENSEMBL	gene_name	logFC	P.Value	adj.P.Val	Pass adj p and correction for 7 Menstrual Cycle Tests
ENSG00000154822	PLCL2	-0.578683	0.00188857	0.0755426	No
ENSG00000123739	PLA2G12A	-0.262122	0.0278786	0.557572	No
ENSG00000163686	ABHD6	0.347924	0.0780792	0.853784	No
ENSG00000161714	PLCD3	0.419495	0.0941631	0.853784	No
ENSG00000138744	NAAA	-0.431327	0.106723	0.853784	No
ENSG00000134780	DAGLA	0.400945	0.141478	0.943187	No
ENSG00000114805	PLCH1	-0.405406	0.203272	0.981988	No
ENSG00000137841	PLCB2	0.320131	0.224273	0.981988	No
ENSG00000182621	PLCB1	-0.299154	0.304461	0.981988	No
ENSG00000115896	PLCL1	0.48078	0.318392	0.981988	No
ENSG00000101333	PLCB4	-0.272722	0.323126	0.981988	No
ENSG00000116711	PLA2G4A	-0.363692	0.341936	0.981988	No
ENSG00000117480	FAAH	-0.17887	0.359349	0.981988	No
ENSG00000149782	PLCB3	0.155489	0.394434	0.981988	No
ENSG00000100997	ABHD12	0.149969	0.400299	0.981988	No
ENSG00000124181	PLCG1	0.104705	0.465888	0.981988	No
ENSG00000012779	ALOX5	0.278425	0.485602	0.981988	No
ENSG00000100197	CYP2D6	0.280086	0.494211	0.981988	No
ENSG00000243708	PLA2G4B	-0.416538	0.498142	0.981988	No
ENSG00000149527	PLCH2	-0.320759	0.526333	0.981988	No
ENSG00000161048	NAPEPLD	-0.0774633	0.617298	0.981988	No
ENSG00000196689	TRPV1	0.130342	0.621836	0.981988	No
ENSG00000146070	PLA2G7	0.165754	0.647056	0.981988	No
ENSG00000100439	ABHD4	0.0802927	0.691676	0.981988	No
ENSG00000197943	PLCG2	-0.0881395	0.708178	0.981988	No
ENSG00000184381	PLA2G6	-0.105827	0.720573	0.981988	No
ENSG00000164687	FABP5	-0.146411	0.742534	0.981988	No
ENSG00000074416	MGLL	-0.0895984	0.748351	0.981988	No
ENSG00000075651	PLD1	-0.119641	0.758842	0.981988	No
ENSG00000138193	PLCE1	-0.0640639	0.798681	0.981988	No
ENSG00000153982	GDPD1	0.0681172	0.802151	0.981988	No
ENSG00000171428	NAT1	-0.0668345	0.807443	0.981988	No
ENSG00000006007	GDE1	-0.0273109	0.828801	0.981988	No
ENSG00000187091	PLCD1	0.0492766	0.83469	0.981988	No
ENSG00000121769	FABP3	-0.108705	0.876539	0.989744	No
ENSG00000134242	PTPN22	0.0379712	0.911337	0.989744	No
ENSG00000129219	PLD2	0.0113398	0.93341	0.989744	No
ENSG00000102886	GDPD3	-0.0107928	0.977847	0.989744	No
ENSG00000073756	PTGS2	0.0182119	0.982824	0.989744	No
ENSG00000105499	PLA2G4C	-0.0032408	0.989744	0.989744	No

## Sheet: TableS11
S11: Differential gene expression analysis between the mid proliferative late proliferative stage
ENSEMBL	gene_name	logFC	P.Value	adj.P.Val	Pass adj p and correction for 7 Menstrual Cycle Tests
ENSG00000115896	PLCL1	-0.93867	9.3703e-05	0.00374812	Yes
ENSG00000073756	PTGS2	-1.21776	0.00254082	0.0508164	No
ENSG00000154822	PLCL2	0.242485	0.00873584	0.0908941	No
ENSG00000101333	PLCB4	-0.346591	0.0112587	0.0908941	No
ENSG00000197943	PLCG2	0.29864	0.0129827	0.0908941	No
ENSG00000114805	PLCH1	-0.402607	0.0136341	0.0908941	No
ENSG00000117480	FAAH	0.232949	0.0205361	0.111901	No
ENSG00000105499	PLA2G4C	0.287885	0.0250266	0.111901	No
ENSG00000116711	PLA2G4A	-0.433748	0.0251778	0.111901	No
ENSG00000100997	ABHD12	-0.195168	0.0325039	0.130016	No
ENSG00000075651	PLD1	0.39474	0.0551391	0.197275	No
ENSG00000138744	NAAA	-0.248593	0.0591826	0.197275	No
ENSG00000137841	PLCB2	0.257025	0.0643113	0.197881	No
ENSG00000153982	GDPD1	0.255678	0.0724071	0.206877	No
ENSG00000134242	PTPN22	0.274944	0.112527	0.300071	No
ENSG00000171428	NAT1	-0.202229	0.128172	0.313564	No
ENSG00000161048	NAPEPLD	-0.116686	0.133265	0.313564	No
ENSG00000138193	PLCE1	0.164833	0.201848	0.448551	No
ENSG00000134780	DAGLA	-0.140133	0.326056	0.636537	No
ENSG00000012779	ALOX5	0.194407	0.339375	0.636537	No
ENSG00000149527	PLCH2	0.239691	0.346061	0.636537	No
ENSG00000129219	PLD2	0.0649774	0.350096	0.636537	No
ENSG00000243708	PLA2G4B	0.282371	0.372457	0.647751	No
ENSG00000161714	PLCD3	0.110731	0.38971	0.649516	No
ENSG00000100197	CYP2D6	0.173339	0.419524	0.671239	No
ENSG00000182621	PLCB1	-0.109745	0.461803	0.710467	No
ENSG00000121769	FABP3	-0.217935	0.515141	0.723642	No
ENSG00000164687	FABP5	-0.129783	0.522851	0.723642	No
ENSG00000074416	MGLL	-0.0909788	0.52464	0.723642	No
ENSG00000124181	PLCG1	0.0405735	0.579391	0.772522	No
ENSG00000163686	ABHD6	-0.0511362	0.620069	0.800089	No
ENSG00000149782	PLCB3	0.0418411	0.653137	0.800115	No
ENSG00000102886	GDPD3	0.0873341	0.660095	0.800115	No
ENSG00000006007	GDE1	0.0221661	0.731462	0.860543	No
ENSG00000184381	PLA2G6	0.0435844	0.776492	0.887419	No
ENSG00000196689	TRPV1	-0.0305394	0.822863	0.914292	No
ENSG00000146070	PLA2G7	-0.0288153	0.873113	0.933741	No
ENSG00000123739	PLA2G12A	-0.00848689	0.887054	0.933741	No
ENSG00000187091	PLCD1	-0.00166845	0.988875	0.999976	No
ENSG00000100439	ABHD4	-3.15052e-06	0.999976	0.999976	No

## Sheet: TableS12
S12: Differential gene expression analysis between the late proliferative and early secretory stage
ENSEMBL	gene_name	logFC	P.Value	adj.P.Val	Pass adj p and correction for 7 Menstrual Cycle Tests
ENSG00000115896	PLCL1	-2.38992	2.02001e-16	8.08003e-15	Yes
ENSG00000102886	GDPD3	-1.68531	1.42923e-12	2.85846e-11	Yes
ENSG00000006007	GDE1	0.448529	5.71154e-09	7.61539e-08	Yes
ENSG00000153982	GDPD1	0.759986	5.34188e-06	5.34188e-05	Yes
ENSG00000161714	PLCD3	-0.657815	9.76826e-06	7.81461e-05	Yes
ENSG00000149527	PLCH2	-1.26211	1.66689e-05	0.000111126	Yes
ENSG00000100997	ABHD12	-0.388271	0.000210164	0.00120094	Yes
ENSG00000117480	FAAH	0.420799	0.000317202	0.00158601	Yes
ENSG00000100439	ABHD4	-0.416035	0.00045121	0.00186851	Yes
ENSG00000164687	FABP5	-0.812268	0.000467128	0.00186851	Yes
ENSG00000075651	PLD1	0.83025	0.000588493	0.00213998	Yes
ENSG00000197943	PLCG2	-0.434371	0.00151819	0.00506065	Yes
ENSG00000154822	PLCL2	0.322479	0.00239008	0.0069883	Yes
ENSG00000184381	PLA2G6	-0.528137	0.002545	0.0069883	Yes
ENSG00000101333	PLCB4	-0.46905	0.00262061	0.0069883	Yes
ENSG00000123739	PLA2G12A	0.205759	0.00283141	0.00707852	Yes
ENSG00000116711	PLA2G4A	-0.631821	0.00425459	0.0100108	No
ENSG00000146070	PLA2G7	-0.581975	0.004823	0.0107178	No
ENSG00000171428	NAT1	0.331969	0.0304046	0.0615891	No
ENSG00000074416	MGLL	-0.353326	0.0307946	0.0615891	No
ENSG00000129219	PLD2	0.150879	0.0583425	0.111129	No
ENSG00000149782	PLCB3	-0.179283	0.0915856	0.166519	No
ENSG00000138193	PLCE1	0.221957	0.132193	0.2299	No
ENSG00000243708	PLA2G4B	-0.521613	0.145521	0.241019	No
ENSG00000105499	PLA2G4C	-0.209059	0.150637	0.241019	No
ENSG00000124181	PLCG1	0.117591	0.158684	0.244129	No
ENSG00000182621	PLCB1	-0.20977	0.216832	0.321233	No
ENSG00000134242	PTPN22	0.230195	0.244337	0.344514	No
ENSG00000121769	FABP3	0.441441	0.249773	0.344514	No
ENSG00000134780	DAGLA	-0.158669	0.328166	0.437554	No
ENSG00000114805	PLCH1	0.173649	0.347049	0.447805	No
ENSG00000012779	ALOX5	-0.204949	0.374161	0.464538	No
ENSG00000137841	PLCB2	-0.137123	0.383244	0.464538	No
ENSG00000073756	PTGS2	-0.345652	0.442232	0.520274	No
ENSG00000161048	NAPEPLD	-0.0600668	0.495693	0.566507	No
ENSG00000138744	NAAA	-0.0800067	0.591777	0.657531	No
ENSG00000196689	TRPV1	0.0391545	0.80093	0.849109	No
ENSG00000100197	CYP2D6	0.054219	0.82414	0.849109	No
ENSG00000163686	ABHD6	-0.0255138	0.827881	0.849109	No
ENSG00000187091	PLCD1	-0.0230518	0.86573	0.86573	No

## Sheet: Table13
S13: Differential gene expression analysis between the early secretory and mid secretory stage
ENSEMBL	gene_name	logFC	P.Value	adj.P.Val	Pass adj p and correction for 7 Menstrual Cycle Tests
ENSG00000114805	PLCH1	1.5613	5.34497e-18	2.13799e-16	Yes
ENSG00000116711	PLA2G4A	1.46405	8.60599e-13	1.27483e-11	Yes
ENSG00000182621	PLCB1	1.13008	9.56123e-13	1.27483e-11	Yes
ENSG00000161714	PLCD3	-0.786467	1.40273e-09	1.40273e-08	Yes
ENSG00000138744	NAAA	0.735201	6.15137e-08	4.92109e-07	Yes
ENSG00000073756	PTGS2	2.1803	1.6795e-07	1.11966e-06	Yes
ENSG00000123739	PLA2G12A	0.319003	2.31989e-07	1.32565e-06	Yes
ENSG00000012779	ALOX5	-0.82273	4.13091e-05	0.000206545	Yes
ENSG00000117480	FAAH	-0.412463	6.03084e-05	0.000258267	Yes
ENSG00000075651	PLD1	-0.85333	6.45668e-05	0.000258267	Yes
ENSG00000134780	DAGLA	0.562058	9.77598e-05	0.00035549	Yes
ENSG00000121769	FABP3	-1.2898	0.000134641	0.000448804	Yes
ENSG00000102886	GDPD3	0.69972	0.000316516	0.000973894	Yes
ENSG00000134242	PTPN22	-0.608613	0.000442162	0.00126332	Yes
ENSG00000161048	NAPEPLD	0.271658	0.000497019	0.00132538	Yes
ENSG00000137841	PLCB2	-0.451645	0.000991534	0.00247883	Yes
ENSG00000100997	ABHD12	0.284897	0.00163724	0.00377557	Yes
ENSG00000101333	PLCB4	-0.426747	0.00169901	0.00377557	Yes
ENSG00000197943	PLCG2	-0.355743	0.00251273	0.00528996	Yes
ENSG00000115896	PLCL1	0.673358	0.00365552	0.00731104	No
ENSG00000124181	PLCG1	0.206166	0.00492662	0.00938404	No
ENSG00000164687	FABP5	-0.487796	0.0126678	0.0230324	No
ENSG00000149782	PLCB3	-0.212829	0.0217065	0.0377504	No
ENSG00000187091	PLCD1	-0.2596	0.0292248	0.048708	No
ENSG00000163686	ABHD6	-0.220399	0.0316272	0.0506035	No
ENSG00000074416	MGLL	0.255469	0.0731086	0.112475	No
ENSG00000138193	PLCE1	0.227046	0.07805	0.11563	No
ENSG00000184381	PLA2G6	0.248168	0.0985271	0.140753	No
ENSG00000129219	PLD2	-0.112038	0.106453	0.146832	No
ENSG00000100439	ABHD4	-0.150716	0.134343	0.179123	No
ENSG00000154822	PLCL2	0.0967832	0.292789	0.377792	No
ENSG00000149527	PLCH2	0.119852	0.625501	0.758724	No
ENSG00000100197	CYP2D6	0.103959	0.625948	0.758724	No
ENSG00000153982	GDPD1	0.0505143	0.723317	0.850961	No
ENSG00000006007	GDE1	0.0158839	0.804744	0.898653	No
ENSG00000146070	PLA2G7	-0.0426539	0.808788	0.898653	No
ENSG00000196689	TRPV1	0.0169082	0.900735	0.973768	No
ENSG00000105499	PLA2G4C	0.00581976	0.962943	0.997121	No
ENSG00000243708	PLA2G4B	-0.00497114	0.987225	0.997121	No
ENSG00000171428	NAT1	-0.000482226	0.997121	0.997121	No

## Sheet: TableS14
S14: Differential gene expression analysis between the mid secretory and late secretory stage
ENSEMBL	gene_name	logFC	P.Value	adj.P.Val	B	Pass adj p and correction for 7 Menstrual Cycle Tests
ENSG00000075651	PLD1	-1.42101	6.83812e-10	2.73525e-08	12.2142	Yes
ENSG00000134242	PTPN22	-0.807103	1.33314e-05	0.000266628	2.95315	Yes
ENSG00000153982	GDPD1	-0.592069	0.000226411	0.00249489	0.430204	Yes
ENSG00000161048	NAPEPLD	0.325361	0.000257128	0.00249489	0.106628	Yes
ENSG00000149527	PLCH2	-0.983214	0.000311861	0.00249489	0.147849	Yes
ENSG00000149782	PLCB3	0.367479	0.000446925	0.0029795	-0.491189	Yes
ENSG00000123739	PLA2G12A	0.218497	0.00133075	0.0076043	-1.47244	No
ENSG00000137841	PLCB2	-0.458617	0.00184253	0.00921263	-1.53574	No
ENSG00000134780	DAGLA	0.505559	0.00248339	0.0110373	-1.81494	No
ENSG00000164687	FABP5	0.652685	0.00299134	0.0119653	-2.14334	No
ENSG00000101333	PLCB4	0.43675	0.00388841	0.0135496	-2.46577	No
ENSG00000102886	GDPD3	0.63168	0.00406487	0.0135496	-2.07258	No
ENSG00000197943	PLCG2	-0.360412	0.00533682	0.016421	-2.72976	No
ENSG00000182621	PLCB1	0.444479	0.0079166	0.0226189	-3.10027	No
ENSG00000187091	PLCD1	-0.326016	0.0128785	0.0313359	-3.48121	No
ENSG00000074416	MGLL	0.395313	0.013311	0.0313359	-3.56013	No
ENSG00000243708	PLA2G4B	0.879752	0.0133178	0.0313359	-3.07934	No
ENSG00000115896	PLCL1	0.608875	0.017653	0.0392288	-3.76397	No
ENSG00000154822	PLCL2	-0.23675	0.0213727	0.042947	-3.89646	No
ENSG00000116711	PLA2G4A	0.505168	0.0214735	0.042947	-3.93761	No
ENSG00000006007	GDE1	-0.161842	0.0247276	0.0471002	-4.09909	No
ENSG00000146070	PLA2G7	-0.368769	0.05985	0.108818	-4.8136	No
ENSG00000138744	NAAA	0.253164	0.090473	0.157344	-5.08662	No
ENSG00000184381	PLA2G6	0.172122	0.308303	0.503032	-5.81208	No
ENSG00000100439	ABHD4	-0.111542	0.314395	0.503032	-5.61613	No
ENSG00000012779	ALOX5	-0.170811	0.415292	0.608304	-5.96919	No
ENSG00000163686	ABHD6	0.0913021	0.419439	0.608304	-6.01972	No
ENSG00000171428	NAT1	0.119081	0.425813	0.608304	-6.03563	No
ENSG00000073756	PTGS2	0.313736	0.508661	0.688126	-5.9885	No
ENSG00000196689	TRPV1	-0.0937779	0.532841	0.688126	-5.93366	No
ENSG00000105499	PLA2G4C	-0.0863354	0.533298	0.688126	-6.01385	No
ENSG00000138193	PLCE1	0.0776268	0.59069	0.718859	-6.05245	No
ENSG00000121769	FABP3	-0.186518	0.59825	0.718859	-6.42473	No
ENSG00000100997	ABHD12	0.0509512	0.61103	0.718859	-5.97197	No
ENSG00000117480	FAAH	-0.0482322	0.661784	0.756325	-6.41269	No
ENSG00000100197	CYP2D6	-0.0943301	0.691741	0.768601	-6.24518	No
ENSG00000161714	PLCD3	0.0459557	0.734959	0.79455	-5.75668	No
ENSG00000129219	PLD2	0.0160561	0.834695	0.858479	-6.47104	No
ENSG00000114805	PLCH1	0.0389378	0.837017	0.858479	-6.47901	No
ENSG00000124181	PLCG1	0.00519634	0.948805	0.948805	-6.43993	No
