# Supplementary material for: Gene Expression of the Endocannabinoid System in Endometrium Through Menstrual Cycle
Source: Research Square preprint supplement (doi:10.21203/rs.3.rs-1084037/v1), 2021-11-30
Supplement: Supplementary file 2 [file 4bd12ebd3cea858e741ec9e1.xlsx]

## Sheet: Sheet1
S1: Gene expression of the ECS detected in endometrium samples
Examined	No expression	< 10 counts in 1 sample	>90% of samples	3 or more samples	at least 1 sample
ABHD12			ABHD12	ABHD12	ABHD12
ABHD4			ABHD4	ABHD4	ABHD4
ABHD6			ABHD6	ABHD6	ABHD6
ALOX12				ALOX12	ALOX12
ALOX15				ALOX15	ALOX15
ALOX5			ALOX5	ALOX5	ALOX5
CNR1				CNR1	CNR1
CNR2				CNR2	CNR2
COX-2			COX-2	COX-2	COX-2
CYP2D6			CYP2D6	CYP2D6	CYP2D6
CYP3A4				CYP3A4	CYP3A4
CYP4F2					CYP4F2
DAGL			DAGL	DAGL	DAGL
FAAH			FAAH	FAAH	FAAH
FABP1		FABP1
FABP2				FABP2	FABP2
FABP3			FABP3	FABP3	FABP3
FABP4				FABP4	FABP4
FABP5			FABP5	FABP5	FABP5
FABP6				FABP6	FABP6
FABP7					FABP7
GDE-1			GDE-1	GDE-1	GDE-1
GDE4			GDE4	GDE4	GDE4
GDE7			GDE7	GDE7	GDE7
GPR119		GPR119
GPR55				GPR55	GPR55
MAGL			MAGL	MAGL	MAGL
NAAA			NAAA	NAAA	NAAA
NAPE-PLD			NAPE-PLD	NAPE-PLD	NAPE-PLD
NAT1			NAT1	NAT1	NAT1
NAT2				NAT2	NAT2
PLA2G10				PLA2G10	PLA2G10
PLA2G12A			PLA2G12A	PLA2G12A	PLA2G12A
PLA2G12B		PLA2G12B
PLA2G1B					PLA2G1B
PLA2G2A				PLA2G2A	PLA2G2A
PLA2G2C				PLA2G2C	PLA2G2C
PLA2G2E	PLA2G2E
PLA2G2F		PLA2G2F
PLA2G3				PLA2G3	PLA2G3
PLA2G4A			PLA2G4A	PLA2G4A	PLA2G4A
PLA2G4B			PLA2G4B	PLA2G4B	PLA2G4B
PLA2G4C			PLA2G4C	PLA2G4C	PLA2G4C
PLA2G4D				PLA2G4D	PLA2G4D
PLA2G4E				PLA2G4E	PLA2G4E
PLA2G4F				PLA2G4F	PLA2G4F
PLA2G5				PLA2G5	PLA2G5
PLA2G6			PLA2G6	PLA2G6	PLA2G6
PLA2G7			PLA2G7	PLA2G7	PLA2G7
PLAG2D				PLAG2D	PLAG2D
PLCB1			PLCB1	PLCB1	PLCB1
PLCB2			PLCB2	PLCB2	PLCB2
PLCB3			PLCB3	PLCB3	PLCB3
PLCB4			PLCB4	PLCB4	PLCB4
PLCD1			PLCD1	PLCD1	PLCD1
PLCD3			PLCD3	PLCD3	PLCD3
PLCD4				PLCD4	PLCD4
PLCE1			PLCE1	PLCE1	PLCE1
PLCG1			PLCG1	PLCG1	PLCG1
PLCG2			PLCG2	PLCG2	PLCG2
PLCH1			PLCH1	PLCH1	PLCH1
PLCH2			PLCH2	PLCH2	PLCH2
PLCL1			PLCL1	PLCL1	PLCL1
PLCL2			PLCL2	PLCL2	PLCL2
PLCZ1		PLCZ1
PLD1			PLD1	PLD1	PLD1
PLD2			PLD2	PLD2	PLD2
PTPN22			PTPN22	PTPN22	PTPN22
TRPA1				TRPA1	TRPA1
TRPV1			TRPV1	TRPV1	TRPV1
			40
