# Supplementary material for: Gene Expression of the Endocannabinoid System in Endometrium Through Menstrual Cycle
Source: Research Square preprint supplement (doi:10.21203/rs.3.rs-1084037/v1), 2021-11-30
Supplement: Supplementary file 3 [file 4e56ed7b8e6d107261ee5b7c.xlsx]

## Sheet: Table S8
S2: Differential gene expression analysis of all cases and controls
ENSEMBL	gene_name	logFC	P.Value	adj.P.Val	Pass correction for 7 Case vs Control Tests
ENSG00000161714	PLCD3	-0.166234	0.0317895	0.791808	No
ENSG00000073756	PTGS2	0.426839	0.0640024	0.791808	No
ENSG00000164687	FABP5	-0.230043	0.0773762	0.791808	No
ENSG00000163686	ABHD6	-0.113208	0.0791808	0.791808	No
ENSG00000187091	PLCD1	-0.113705	0.140719	0.863208	No
ENSG00000146070	PLA2G7	-0.159118	0.155935	0.863208	No
ENSG00000138193	PLCE1	-0.110072	0.190875	0.863208	No
ENSG00000100997	ABHD12	-0.0744788	0.193522	0.863208	No
ENSG00000075651	PLD1	0.153915	0.203589	0.863208	No
ENSG00000171428	NAT1	0.110055	0.215802	0.863208	No
ENSG00000123739	PLA2G12A	0.0397169	0.304648	0.887461	No
ENSG00000184381	PLA2G6	0.0906618	0.346517	0.887461	No
ENSG00000182621	PLCB1	0.0787142	0.400372	0.887461	No
ENSG00000243708	PLA2G4B	0.152178	0.439667	0.887461	No
ENSG00000100197	CYP2D6	0.102806	0.439848	0.887461	No
ENSG00000115896	PLCL1	-0.10383	0.484274	0.887461	No
ENSG00000137841	PLCB2	0.0557268	0.507492	0.887461	No
ENSG00000129219	PLD2	-0.0275461	0.533528	0.887461	No
ENSG00000124181	PLCG1	0.028355	0.536836	0.887461	No
ENSG00000197943	PLCG2	0.0440892	0.550857	0.887461	No
ENSG00000006007	GDE1	0.0234856	0.56191	0.887461	No
ENSG00000153982	GDPD1	0.0497793	0.565623	0.887461	No
ENSG00000105499	PLA2G4C	0.0409544	0.605936	0.887461	No
ENSG00000161048	NAPEPLD	0.0228419	0.65485	0.887461	No
ENSG00000114805	PLCH1	-0.0468046	0.657265	0.887461	No
ENSG00000012779	ALOX5	0.0441445	0.697969	0.887461	No
ENSG00000121769	FABP3	-0.0782864	0.711712	0.887461	No
ENSG00000102886	GDPD3	-0.0438034	0.723064	0.887461	No
ENSG00000149782	PLCB3	-0.019325	0.742787	0.887461	No
ENSG00000100439	ABHD4	-0.0210202	0.744564	0.887461	No
ENSG00000074416	MGLL	0.0276049	0.758657	0.887461	No
ENSG00000154822	PLCL2	0.0170703	0.77207	0.887461	No
ENSG00000134780	DAGLA	-0.0273238	0.776545	0.887461	No
ENSG00000149527	PLCH2	-0.0421307	0.78733	0.887461	No
ENSG00000101333	PLCB4	-0.0214585	0.805802	0.887461	No
ENSG00000138744	NAAA	0.0214714	0.813109	0.887461	No
ENSG00000134242	PTPN22	-0.0201395	0.841243	0.887461	No
ENSG00000196689	TRPV1	0.0167664	0.843088	0.887461	No
ENSG00000116711	PLA2G4A	-0.0125297	0.918012	0.941551	No
ENSG00000117480	FAAH	-0.00416754	0.94858	0.94858	No
