# Supplementary material for: Gene Expression of the Endocannabinoid System in Endometrium Through Menstrual Cycle
Source: Research Square preprint supplement (doi:10.21203/rs.3.rs-1084037/v1), 2021-11-30
Supplement: Supplementary file 4 [file deec8f52d105a118a1d59b3d.xlsx]

## Sheet: Table S3
S3: Differential gene expression analysis of cases and controls in the menstrual stage
ENSEMBL	gene_name	logFC	P.Value	adj.P.Val	Pass adj p and correction for 7 Menstrual Cycle Tests
ENSG00000146070	PLA2G7	2.03327	0.0274875	0.827537	No
ENSG00000100197	CYP2D6	-2.11295	0.0777183	0.827537	No
ENSG00000012779	ALOX5	2.56112	0.114267	0.827537	No
ENSG00000134780	DAGLA	-2.33002	0.141338	0.827537	No
ENSG00000124181	PLCG1	-0.788176	0.19991	0.827537	No
ENSG00000102886	GDPD3	-1.93778	0.200417	0.827537	No
ENSG00000121769	FABP3	1.62047	0.206395	0.827537	No
ENSG00000075651	PLD1	1.07308	0.242232	0.827537	No
ENSG00000123739	PLA2G12A	-0.853696	0.247465	0.827537	No
ENSG00000073756	PTGS2	2.70655	0.265786	0.827537	No
ENSG00000114805	PLCH1	-1.13071	0.268852	0.827537	No
ENSG00000115896	PLCL1	1.28098	0.296257	0.827537	No
ENSG00000118432	CNR1	1.01206	0.357669	0.827537	No
ENSG00000161048	NAPEPLD	-0.773121	0.365992	0.827537	No
ENSG00000149782	PLCB3	-0.719145	0.395446	0.827537	No
ENSG00000138744	NAAA	-0.73866	0.399482	0.827537	No
ENSG00000100439	ABHD4	0.647483	0.410801	0.827537	No
ENSG00000137841	PLCB2	-0.91827	0.418163	0.827537	No
ENSG00000187091	PLCD1	-0.59444	0.455375	0.827537	No
ENSG00000196689	TRPV1	-0.749855	0.465624	0.827537	No
ENSG00000074416	MGLL	0.885747	0.518007	0.827537	No
ENSG00000129219	PLD2	-0.468179	0.531725	0.827537	No
ENSG00000184381	PLA2G6	-0.741063	0.536154	0.827537	No
ENSG00000105499	PLA2G4C	-0.552524	0.537027	0.827537	No
ENSG00000138193	PLCE1	-0.775966	0.54166	0.827537	No
ENSG00000171428	NAT1	-0.485256	0.558482	0.827537	No
ENSG00000149527	PLCH2	-1.04435	0.572021	0.827537	No
ENSG00000182621	PLCB1	-0.735013	0.57562	0.827537	No
ENSG00000101333	PLCB4	0.375201	0.585331	0.827537	No
ENSG00000243708	PLA2G4B	-0.741436	0.618492	0.845272	No
ENSG00000100997	ABHD12	-0.291625	0.68924	0.905885	No
ENSG00000154822	PLCL2	-0.282845	0.707032	0.905885	No
ENSG00000134242	PTPN22	0.305559	0.748284	0.916845	No
ENSG00000153982	GDPD1	-0.32975	0.76031	0.916845	No
ENSG00000163686	ABHD6	-0.242907	0.785464	0.920114	No
ENSG00000117480	FAAH	-0.183428	0.830899	0.944498	No
ENSG00000161714	PLCD3	-0.111868	0.872722	0.944498	No
ENSG00000197943	PLCG2	0.123718	0.875389	0.944498	No
ENSG00000116711	PLA2G4A	-0.0579092	0.937352	0.964189	No
ENSG00000164687	FABP5	0.0887691	0.957149	0.964189	No
ENSG00000006007	GDE1	-0.0265558	0.964189	0.964189	No

## Sheet: Table S4
S4: Differential gene expression analysis of cases and controls in the mid proliferative stage
ENSEMBL	gene_name	logFC	P.Value	adj.P.Val	Pass adj p and correction for 7 Menstrual Cycle Tests
ENSG00000121769	FABP3	0.422957	0.0953913	0.972163	No
ENSG00000114805	PLCH1	-0.190198	0.113603	0.972163	No
ENSG00000243708	PLA2G4B	-0.556851	0.146733	0.972163	No
ENSG00000149782	PLCB3	0.129414	0.156544	0.972163	No
ENSG00000164687	FABP5	0.202199	0.167884	0.972163	No
ENSG00000171428	NAT1	0.220212	0.185199	0.972163	No
ENSG00000073756	PTGS2	0.664595	0.21301	0.972163	No
ENSG00000197943	PLCG2	0.0852414	0.244637	0.972163	No
ENSG00000134242	PTPN22	-0.19291	0.270674	0.972163	No
ENSG00000184381	PLA2G6	-0.203966	0.298722	0.972163	No
ENSG00000153982	GDPD1	-0.107172	0.391647	0.972163	No
ENSG00000100997	ABHD12	-0.0867491	0.422361	0.972163	No
ENSG00000117480	FAAH	-0.0873902	0.447748	0.972163	No
ENSG00000163686	ABHD6	0.0855293	0.452022	0.972163	No
ENSG00000115896	PLCL1	0.261354	0.480635	0.972163	No
ENSG00000012779	ALOX5	-0.16669	0.486442	0.972163	No
ENSG00000134780	DAGLA	0.0986105	0.53043	0.972163	No
ENSG00000149527	PLCH2	-0.200267	0.56069	0.972163	No
ENSG00000074416	MGLL	0.0784371	0.595446	0.972163	No
ENSG00000129219	PLD2	0.044899	0.608038	0.972163	No
ENSG00000138193	PLCE1	-0.0701478	0.617539	0.972163	No
ENSG00000182621	PLCB1	-0.0568515	0.632025	0.972163	No
ENSG00000187091	PLCD1	0.0404945	0.638057	0.972163	No
ENSG00000137841	PLCB2	-0.0740717	0.665817	0.972163	No
ENSG00000161714	PLCD3	0.0529094	0.686629	0.972163	No
ENSG00000101333	PLCB4	-0.0525532	0.697156	0.972163	No
ENSG00000196689	TRPV1	-0.0614465	0.741314	0.972163	No
ENSG00000075651	PLD1	0.0409762	0.755026	0.972163	No
ENSG00000105499	PLA2G4C	-0.0499825	0.771683	0.972163	No
ENSG00000161048	NAPEPLD	-0.0247377	0.773513	0.972163	No
ENSG00000115556	PLCD4	-0.0773867	0.78288	0.972163	No
ENSG00000006007	GDE1	-0.0137379	0.85276	0.972163	No
ENSG00000154822	PLCL2	0.0190264	0.871947	0.972163	No
ENSG00000100439	ABHD4	-0.0250586	0.872079	0.972163	No
ENSG00000146070	PLA2G7	-0.0236848	0.894647	0.972163	No
ENSG00000102886	GDPD3	-0.0287284	0.896572	0.972163	No
ENSG00000100197	CYP2D6	-0.0299977	0.902319	0.972163	No
ENSG00000170231	FABP6	0.048608	0.914491	0.972163	No
ENSG00000138744	NAAA	0.0141403	0.92203	0.972163	No
ENSG00000123739	PLA2G12A	0.00390867	0.939647	0.972163	No
ENSG00000116711	PLA2G4A	-0.00921876	0.949017	0.972163	No
ENSG00000124181	PLCG1	0.000746452	0.991956	0.991956	No

## Sheet: Table S5
S5: Differential gene expression analysis of cases and controls in the late proliferative stage
ENSEMBL	gene_name	logFC	P.Value	adj.P.Val	Pass adj p and correction for 7 Menstrual Cycle Tests
ENSG00000075651	PLD1	0.651417	0.051213	0.55805	No
ENSG00000153982	GDPD1	0.697205	0.0544994	0.55805	No
ENSG00000114805	PLCH1	-0.629763	0.0549182	0.55805	No
ENSG00000074416	MGLL	-0.457187	0.0622426	0.55805	No
ENSG00000101333	PLCB4	-0.588762	0.0664346	0.55805	No
ENSG00000197943	PLCG2	0.547363	0.120057	0.708722	No
ENSG00000100997	ABHD12	-0.484946	0.124489	0.708722	No
ENSG00000134242	PTPN22	0.730566	0.134995	0.708722	No
ENSG00000138744	NAAA	-0.457349	0.174082	0.71797	No
ENSG00000137841	PLCB2	0.460604	0.174381	0.71797	No
ENSG00000073756	PTGS2	-0.917685	0.206575	0.71797	No
ENSG00000116711	PLA2G4A	-0.49322	0.210654	0.71797	No
ENSG00000117480	FAAH	-0.19194	0.222229	0.71797	No
ENSG00000105499	PLA2G4C	-0.271146	0.243643	0.730928	No
ENSG00000121769	FABP3	0.484917	0.279788	0.741291	No
ENSG00000149527	PLCH2	0.478675	0.282396	0.741291	No
ENSG00000161048	NAPEPLD	0.146142	0.318236	0.753493	No
ENSG00000006007	GDE1	0.167068	0.322925	0.753493	No
ENSG00000146070	PLA2G7	-0.17328	0.433127	0.918404	No
ENSG00000138193	PLCE1	0.208685	0.439632	0.918404	No
ENSG00000100197	CYP2D6	-0.32889	0.459202	0.918404	No
ENSG00000164687	FABP5	-0.234828	0.49101	0.937383	No
ENSG00000012779	ALOX5	0.309624	0.521039	0.948076	No
ENSG00000243708	PLA2G4B	0.231026	0.569552	0.948076	No
ENSG00000182621	PLCB1	-0.117151	0.578363	0.948076	No
ENSG00000123739	PLA2G12A	0.078294	0.586904	0.948076	No
ENSG00000163686	ABHD6	-0.0957245	0.619425	0.949362	No
ENSG00000170231	FABP6	-0.195801	0.653316	0.949362	No
ENSG00000115896	PLCL1	-0.227798	0.668859	0.949362	No
ENSG00000134780	DAGLA	-0.110404	0.699517	0.949362	No
ENSG00000154822	PLCL2	0.0799256	0.704651	0.949362	No
ENSG00000102886	GDPD3	-0.184267	0.723323	0.949362	No
ENSG00000171428	NAT1	0.071154	0.781268	0.969443	No
ENSG00000100439	ABHD4	0.0439021	0.799081	0.969443	No
ENSG00000184381	PLA2G6	-0.0933388	0.807869	0.969443	No
ENSG00000161714	PLCD3	0.0563139	0.856152	0.996296	No
ENSG00000149782	PLCB3	0.0397395	0.87857	0.996296	No
ENSG00000187091	PLCD1	0.0165717	0.93034	0.996296	No
ENSG00000129219	PLD2	0.00584884	0.966528	0.996296	No
ENSG00000156006	NAT2	0.0163153	0.967141	0.996296	No
ENSG00000196689	TRPV1	0.00319663	0.991786	0.996296	No
ENSG00000124181	PLCG1	0.000795854	0.996296	0.996296	No

## Sheet: Table S6
S6: Differential gene expression analysis of cases and controls in the early secretory stage
ENSEMBL	gene_name	t	P.Value	adj.P.Val	Pass adj p and correction for 7 Menstrual Cycle Tests
ENSG00000182621	PLCB1	1.44664	0.00157921	0.0647474	No
ENSG00000161714	PLCD3	-1.00773	0.00470116	0.0963737	No
ENSG00000138744	NAAA	0.998956	0.00904322	0.123591	No
ENSG00000168907	PLA2G4F	2.18629	0.0173414	0.137512	No
ENSG00000117480	FAAH	-0.825133	0.0174562	0.137512	No
ENSG00000123739	PLA2G12A	0.416949	0.0228294	0.137512	No
ENSG00000012779	ALOX5	-0.979958	0.0234777	0.137512	No
ENSG00000129219	PLD2	-0.404965	0.0311382	0.156533	No
ENSG00000161048	NAPEPLD	0.444453	0.0374496	0.156533	No
ENSG00000137841	PLCB2	-0.623873	0.0381787	0.156533	No
ENSG00000114805	PLCH1	1.01853	0.0443225	0.165202	No
ENSG00000105499	PLA2G4C	-0.585671	0.0601738	0.189681	No
ENSG00000075651	PLD1	-0.656514	0.0671476	0.189681	No
ENSG00000121769	FABP3	1.87625	0.067953	0.189681	No
ENSG00000149782	PLCB3	-0.418291	0.0693956	0.189681	No
ENSG00000116711	PLA2G4A	0.763409	0.132403	0.32303	No
ENSG00000124181	PLCG1	-0.213367	0.133939	0.32303	No
ENSG00000196689	TRPV1	-0.367831	0.194861	0.443851	No
ENSG00000115896	PLCL1	0.402879	0.210318	0.453844	No
ENSG00000073756	PTGS2	-0.513592	0.226024	0.46335	No
ENSG00000138193	PLCE1	-0.292002	0.241602	0.4717	No
ENSG00000134242	PTPN22	-0.428504	0.282783	0.507349	No
ENSG00000101333	PLCB4	0.283136	0.284611	0.507349	No
ENSG00000134780	DAGLA	-0.247671	0.338889	0.578936	No
ENSG00000164687	FABP5	0.477756	0.355629	0.583232	No
ENSG00000171428	NAT1	0.290678	0.377608	0.595459	No
ENSG00000149527	PLCH2	-0.363788	0.437555	0.613111	No
ENSG00000006007	GDE1	0.132369	0.441139	0.613111	No
ENSG00000069764	PLA2G10	-0.451292	0.450869	0.613111	No
ENSG00000100439	ABHD4	0.161683	0.454172	0.613111	No
ENSG00000100997	ABHD12	-0.141435	0.463572	0.613111	No
ENSG00000154822	PLCL2	0.138626	0.538015	0.683421	No
ENSG00000197943	PLCG2	-0.148808	0.550071	0.683421	No
ENSG00000146070	PLA2G7	0.138949	0.598484	0.721701	No
ENSG00000074416	MGLL	-0.130752	0.673257	0.788672	No
ENSG00000187091	PLCD1	-0.0923585	0.696045	0.792718	No
ENSG00000153982	GDPD1	0.0959456	0.74467	0.816835	No
ENSG00000102886	GDPD3	-0.109873	0.757067	0.816835	No
ENSG00000243708	PLA2G4B	-0.157958	0.837912	0.880882	No
ENSG00000163686	ABHD6	-0.00871708	0.977794	0.995862	No
ENSG00000184381	PLA2G6	-0.00151625	0.995862	0.995862	No

## Sheet: Table S7
S7: Differential gene expression analysis of cases and controls in the mid secretory stage
ENSEMBL	gene_name	logFC	P.Value	adj.P.Val	Pass adj p and correction for 7 Menstrual Cycle Tests
ENSG00000164687	FABP5	-1.13653	0.0014567	0.0655516	No
ENSG00000069764	PLA2G10	-1.35295	0.00655269	0.147435	No
ENSG00000118432	CNR1	1.38855	0.0138656	0.207984	No
ENSG00000075651	PLD1	0.984147	0.0190543	0.214361	No
ENSG00000243708	PLA2G4B	1.05093	0.0415932	0.352367	No
ENSG00000161714	PLCD3	-0.377144	0.0469822	0.352367	No
ENSG00000163686	ABHD6	-0.306638	0.0615293	0.354924	No
ENSG00000196689	TRPV1	0.367126	0.0683434	0.354924	No
ENSG00000149782	PLCB3	-0.261297	0.0749092	0.354924	No
ENSG00000006007	GDE1	-0.171391	0.0831341	0.354924	No
ENSG00000137841	PLCB2	0.351588	0.0958815	0.354924	No
ENSG00000134242	PTPN22	0.365134	0.103488	0.354924	No
ENSG00000184381	PLA2G6	0.330097	0.119261	0.354924	No
ENSG00000105499	PLA2G4C	0.240312	0.119315	0.354924	No
ENSG00000187091	PLCD1	-0.344851	0.119693	0.354924	No
ENSG00000134780	DAGLA	-0.388005	0.133006	0.354924	No
ENSG00000074416	MGLL	-0.272553	0.135415	0.354924	No
ENSG00000170323	FABP4	-0.519429	0.14197	0.354924	No
ENSG00000182621	PLCB1	-0.378858	0.16395	0.388303	No
ENSG00000146070	PLA2G7	-0.36194	0.185697	0.405601	No
ENSG00000117480	FAAH	0.239754	0.200709	0.405601	No
ENSG00000168907	PLA2G4F	-0.701847	0.203674	0.405601	No
ENSG00000115896	PLCL1	-0.453595	0.207307	0.405601	No
ENSG00000154822	PLCL2	0.123851	0.357247	0.669839	No
ENSG00000114805	PLCH1	-0.270858	0.389907	0.681345	No
ENSG00000149527	PLCH2	0.279139	0.393666	0.681345	No
ENSG00000101333	PLCB4	0.19805	0.420432	0.70072	No
ENSG00000100439	ABHD4	0.0872068	0.445302	0.715665	No
ENSG00000161048	NAPEPLD	0.0935674	0.468246	0.726589	No
ENSG00000100997	ABHD12	-0.0781138	0.54909	0.822326	No
ENSG00000073756	PTGS2	-0.22688	0.616544	0.822326	No
ENSG00000188822	CNR2	0.232386	0.616795	0.822326	No
ENSG00000138193	PLCE1	0.093705	0.649489	0.822326	No
ENSG00000138744	NAAA	0.0928645	0.657418	0.822326	No
ENSG00000153982	GDPD1	0.0915876	0.680977	0.822326	No
ENSG00000197943	PLCG2	0.0692356	0.69489	0.822326	No
ENSG00000116711	PLA2G4A	-0.150255	0.709249	0.822326	No
ENSG00000124181	PLCG1	0.0380881	0.710354	0.822326	No
ENSG00000129219	PLD2	-0.0340463	0.751315	0.822326	No
ENSG00000123739	PLA2G12A	0.0320519	0.766826	0.822326	No
ENSG00000171428	NAT1	-0.0626504	0.766864	0.822326	No
ENSG00000121769	FABP3	-0.18378	0.783997	0.822326	No
ENSG00000188257	PLA2G2A	-0.205765	0.80203	0.822326	No
ENSG00000102886	GDPD3	-0.0821876	0.804053	0.822326	No
ENSG00000012779	ALOX5	0.0233688	0.908841	0.908841	No

## Sheet: Table S8
S8: Differential gene expression analysis of cases and controls in the late secretory stage
ENSEMBL	gene_name	logFC	P.Value	adj.P.Val	Pass adj p and correction for 7 Menstrual Cycle Tests
ENSG00000153982	GDPD1	1.88478	0.00811275	0.249039	No
ENSG00000138193	PLCE1	-0.817033	0.0152051	0.249039	No
ENSG00000101333	PLCB4	-1.3414	0.0173748	0.249039	No
ENSG00000006007	GDE1	0.473464	0.0705896	0.525908	No
ENSG00000134780	DAGLA	-0.792227	0.0770794	0.525908	No
ENSG00000012779	ALOX5	1.78554	0.0812887	0.525908	No
ENSG00000121769	FABP3	-1.69871	0.0856129	0.525908	No
ENSG00000149527	PLCH2	1.28436	0.144599	0.777219	No
ENSG00000168907	PLA2G4F	-1.6491	0.174586	0.782053	No
ENSG00000124181	PLCG1	0.569283	0.181873	0.782053	No
ENSG00000105499	PLA2G4C	0.681838	0.221372	0.816145	No
ENSG00000073756	PTGS2	1.08077	0.239127	0.816145	No
ENSG00000118432	CNR1	-1.00326	0.337976	0.816145	No
ENSG00000149782	PLCB3	-0.302302	0.350553	0.816145	No
ENSG00000163686	ABHD6	-0.38818	0.356454	0.816145	No
ENSG00000164687	FABP5	-0.614617	0.369628	0.816145	No
ENSG00000114805	PLCH1	0.42743	0.376162	0.816145	No
ENSG00000184381	PLA2G6	0.524552	0.381212	0.816145	No
ENSG00000100997	ABHD12	0.179592	0.39058	0.816145	No
ENSG00000075651	PLD1	0.872397	0.415796	0.816145	No
ENSG00000243708	PLA2G4B	-0.808134	0.46633	0.816145	No
ENSG00000154822	PLCL2	0.269392	0.482251	0.816145	No
ENSG00000134242	PTPN22	0.63147	0.489267	0.816145	No
ENSG00000188822	CNR2	-0.447777	0.494096	0.816145	No
ENSG00000074416	MGLL	-0.319508	0.494261	0.816145	No
ENSG00000137841	PLCB2	0.306721	0.495561	0.816145	No
ENSG00000102886	GDPD3	-0.344108	0.512463	0.816145	No
ENSG00000146070	PLA2G7	0.424767	0.595563	0.911897	No
ENSG00000171428	NAT1	0.295022	0.615	0.911897	No
ENSG00000161048	NAPEPLD	-0.15385	0.665232	0.94115	No
ENSG00000115896	PLCL1	-0.285239	0.698313	0.94115	No
ENSG00000196689	TRPV1	0.181033	0.711893	0.94115	No
ENSG00000117480	FAAH	-0.108019	0.747954	0.94115	No
ENSG00000182621	PLCB1	-0.0974984	0.76359	0.94115	No
ENSG00000123739	PLA2G12A	-0.0959535	0.766052	0.94115	No
ENSG00000187091	PLCD1	0.12164	0.841273	0.980035	No
ENSG00000197943	PLCG2	-0.078331	0.898713	0.980035	No
ENSG00000129219	PLD2	0.0381095	0.903719	0.980035	No
ENSG00000116711	PLA2G4A	0.0636951	0.907212	0.980035	No
ENSG00000100197	CYP2D6	-0.0583552	0.922269	0.980035	No
ENSG00000100439	ABHD4	-0.0307812	0.948281	0.980035	No
ENSG00000161714	PLCD3	-0.0151037	0.967756	0.980035	No
ENSG00000138744	NAAA	0.00889066	0.980035	0.980035	No
